# Supplementary material for: The Impaired Neurodevelopment of Human Neural Rosettes in HSV-1-Infected Early Brain Organoids
Source: Cells. 2022 Nov 9;11(22):3539. doi: 10.3390/cells11223539 (PMC9688774; doi:10.3390/cells11223539)

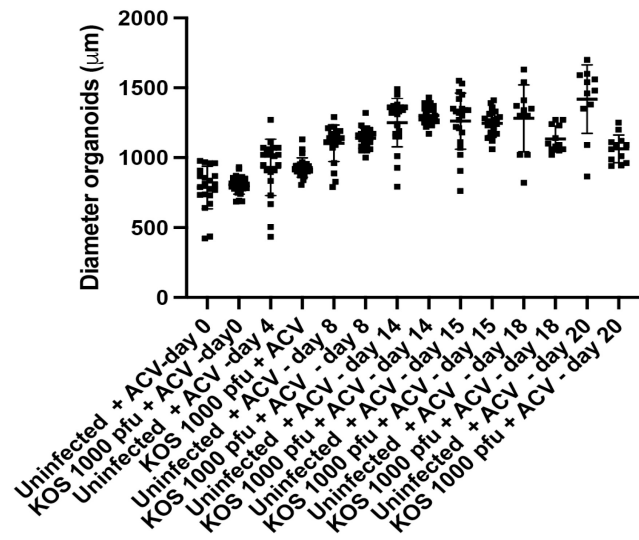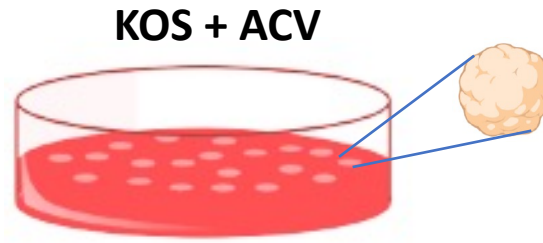

**Infected organoids in neurobasal medium supplemented with ACV**

**Analysis of the presence of infectious particles in the culture supernatants at different time points**

**Serial dilutions of culture media were adsorbed on monolayer cultures of neural progenitor cells and cultured in the presence of antiviral ACV or R430**

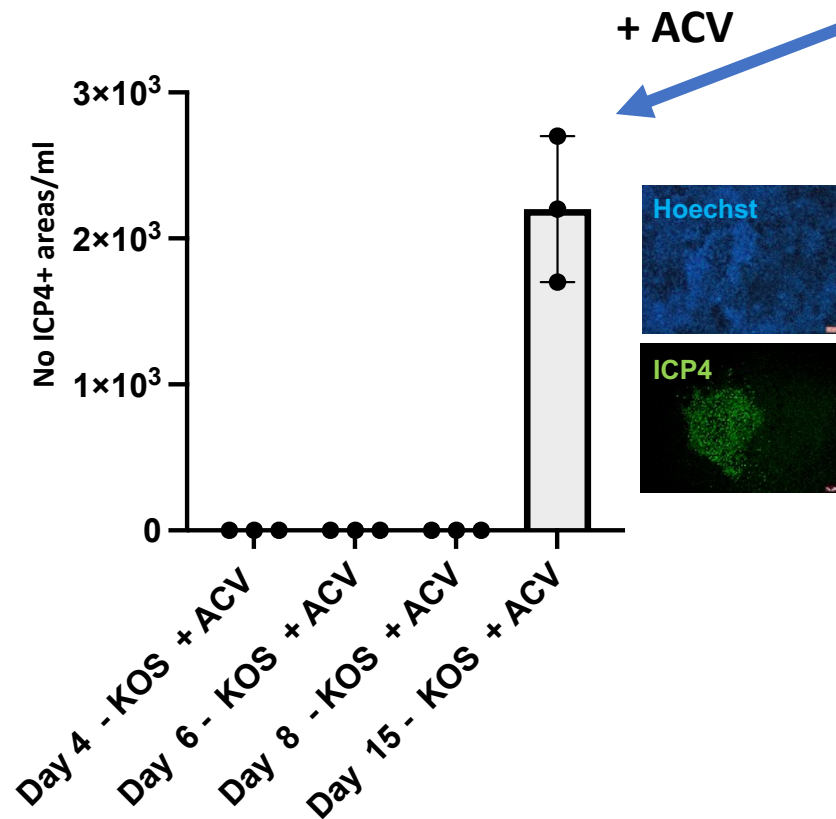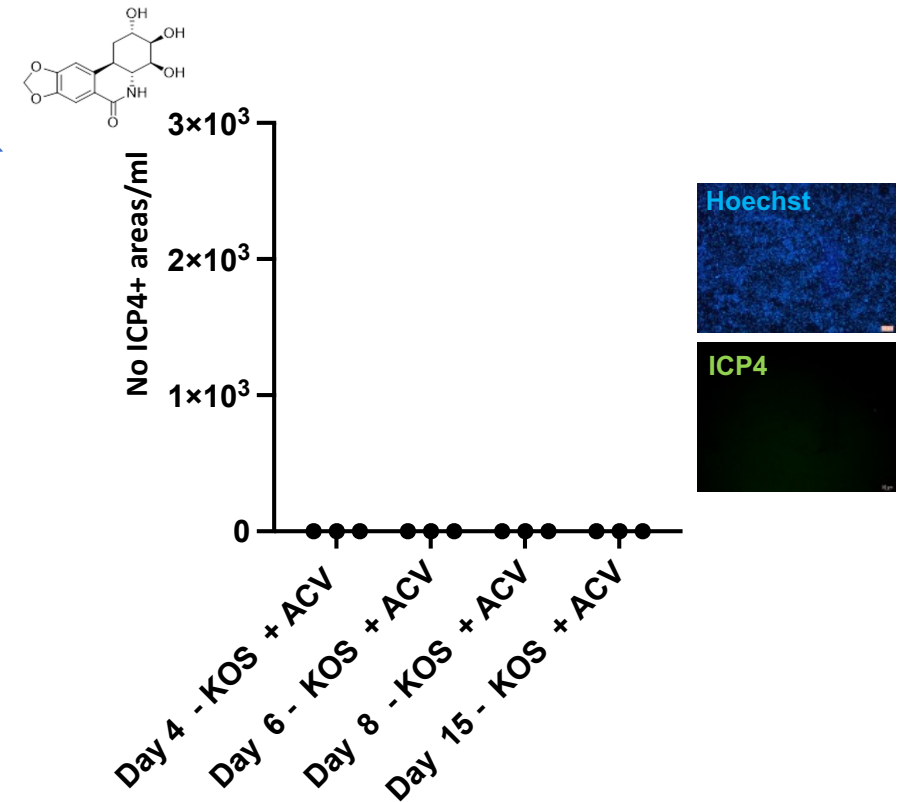

Supplement: Supplementary file 1 [file cells-11-03539-s001.zip › cells-1984846-supplementary/Figure S2.pdf]
