# Supplementary material for: The Impaired Neurodevelopment of Human Neural Rosettes in HSV-1-Infected Early Brain Organoids
Source: Cells. 2022 Nov 9;11(22):3539. doi: 10.3390/cells11223539 (PMC9688774; doi:10.3390/cells11223539)

# ACV-resistance is developed in cultures infected at MOIs 0.1-0.01

No antivirals in the culture medium

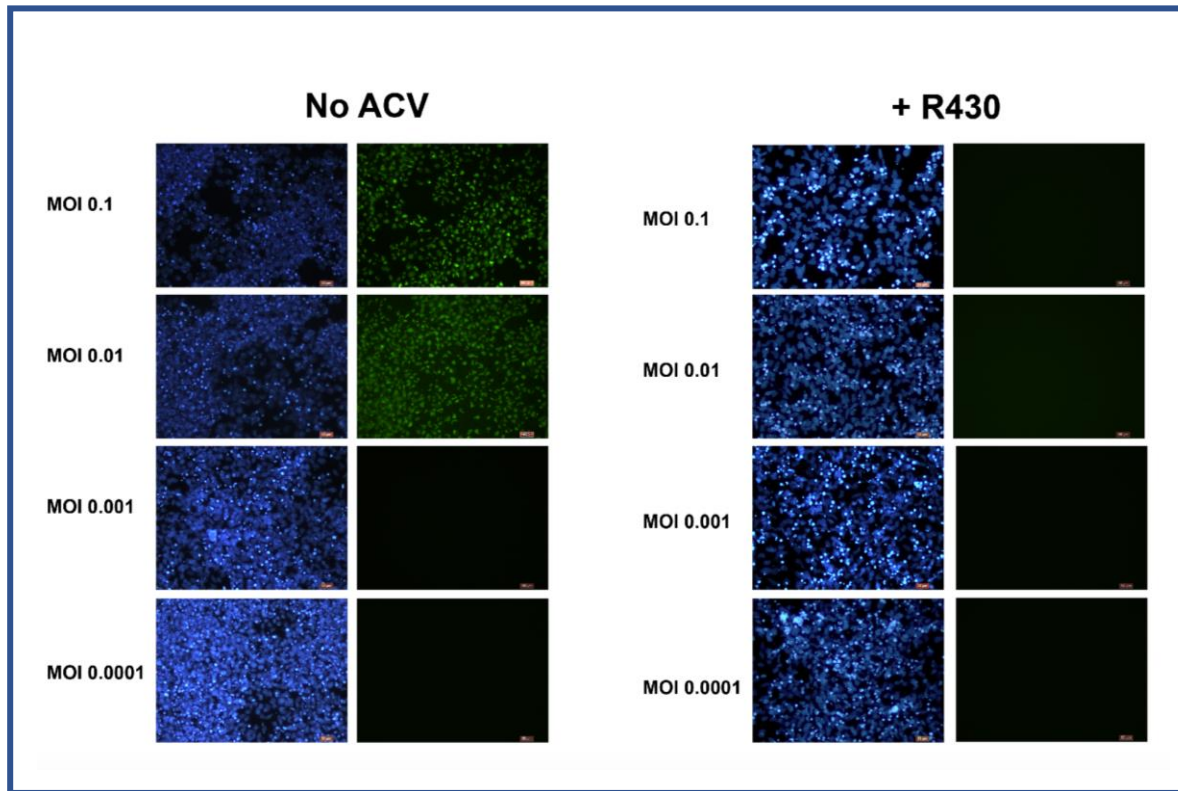

Culture medium supplemented with either ACV or R430

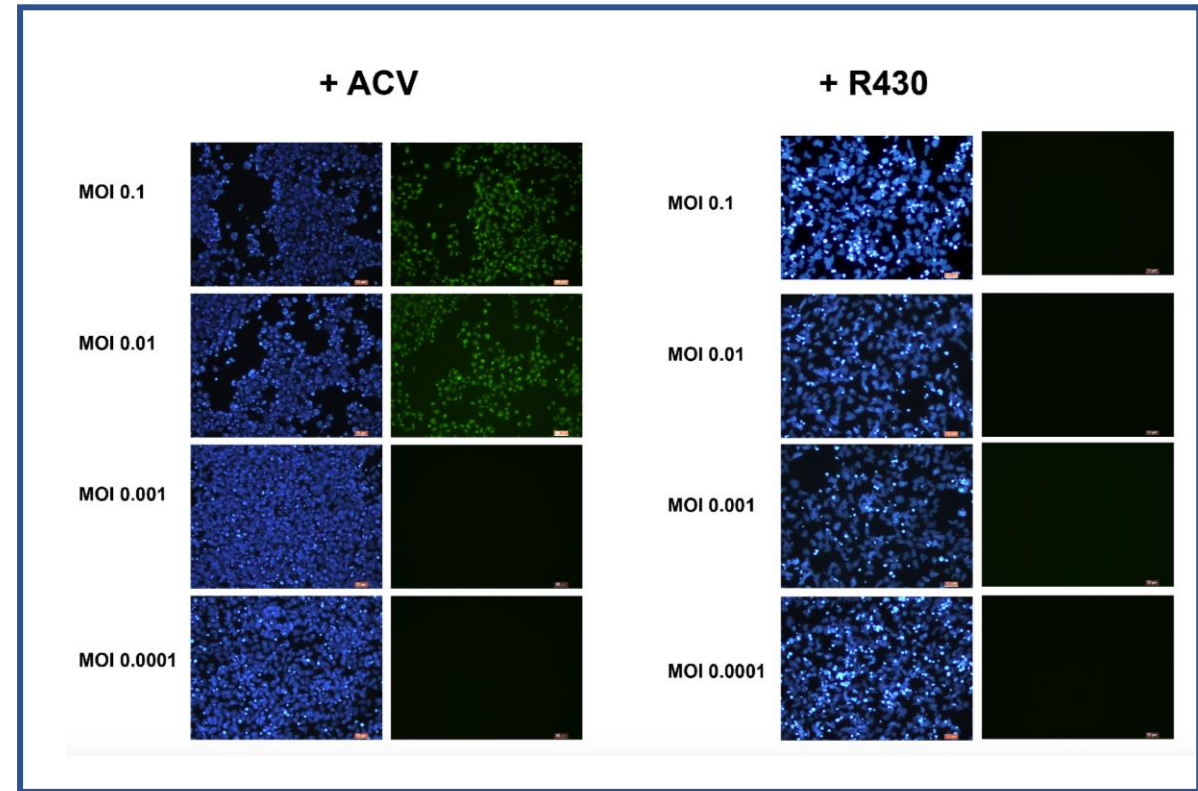

Supplement: Supplementary file 1 [file cells-11-03539-s001.zip › cells-1984846-supplementary/Figure S3.pdf]
